# Supplementary figures and images for: Two dodecanuclear heterometallic [Zn6Ln6] clusters constructed by a multidentate salicylamide salen-like ligand: synthesis, structure, luminescence and magnetic properties
Source: Royal Society of Chemistry journal article supplement (doi:10.1039/c6dt00212a), 2016-01-01

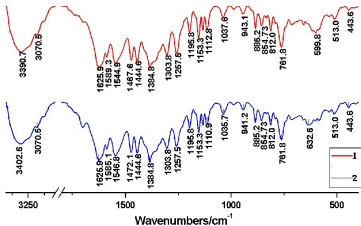

Supplement: c6dt00212a1.pdf [file c6dt00212a1.pdf]

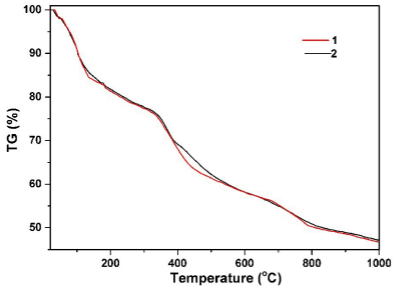

Supplement: c6dt00212a2.pdf [file c6dt00212a2.pdf]

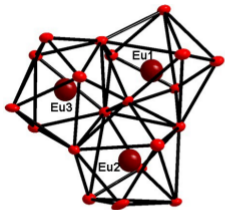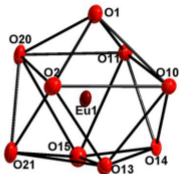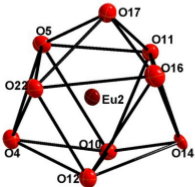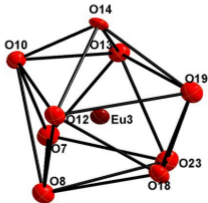

Supplement: c6dt00212a3.pdf [file c6dt00212a3.pdf]

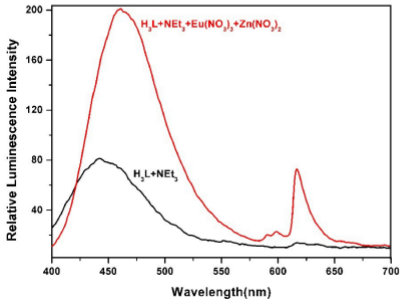

Supplement: c6dt00212a5.pdf [file c6dt00212a5.pdf]
